# Supplementary material
Source: publisher figshare collection journal article supplement (https://acs.figshare.com/ndownloader/files/23554248)
Supplement: Supplementary file 1 [file 23554248]

## Supporting Information

### **Promoting Active Electronic States in LaFeO<sub>3</sub> Thin-Films Photocathodes via Alkaline-Earth Metal Substitution**

*Xin Sun, Devendra Tiwari<sup>†\*</sup> and David J. Fermin<sup>\*</sup>*

*School of Chemistry, University of Bristol, Cantocks Close, Bristol BS8 1 TS, UK*

<sup>‡</sup>*Current affiliation: Department of Mathematics, Physics & Electrical Engineering, Northumbria University, Ellison Place, Newcastle upon Tyne NE1 8ST, UK*

\*Corresponding authors:

[Devendra.Tiwari@northumbria.ac.uk](mailto:Devendra.Tiwari@northumbria.ac.uk)

[David.Fermin@bristol.ac.uk](mailto:David.Fermin@bristol.ac.uk)

**Figure S1.** Topography and composition of alkaline-earth metal cation (AMC) substituted LaFeO<sub>3</sub> (LFO).

**Figure S2.** XRD analysis of AMC substituted LaFeO<sub>3</sub> (LFO).

**Figure S3.** Deconvolution of La 3d, Fe 2p, O 1s XPS bands of 7% Sr substituted LFO thin-film

**Figure S4.** Photoelectrochemical responses of AMC substituted LFO in the presence of O<sub>2</sub>.

**Figure S5.** Photoelectrochemical responses of AMC substituted LFO under O<sub>2</sub> free conditions.

**Figure S6.** Dynamic photocurrent transient responses of pristine and 7% Ba substituted LFO .

**Figure S7.** Oxygen reduction reaction in the dark as a function of Ba<sup>2+</sup> content.

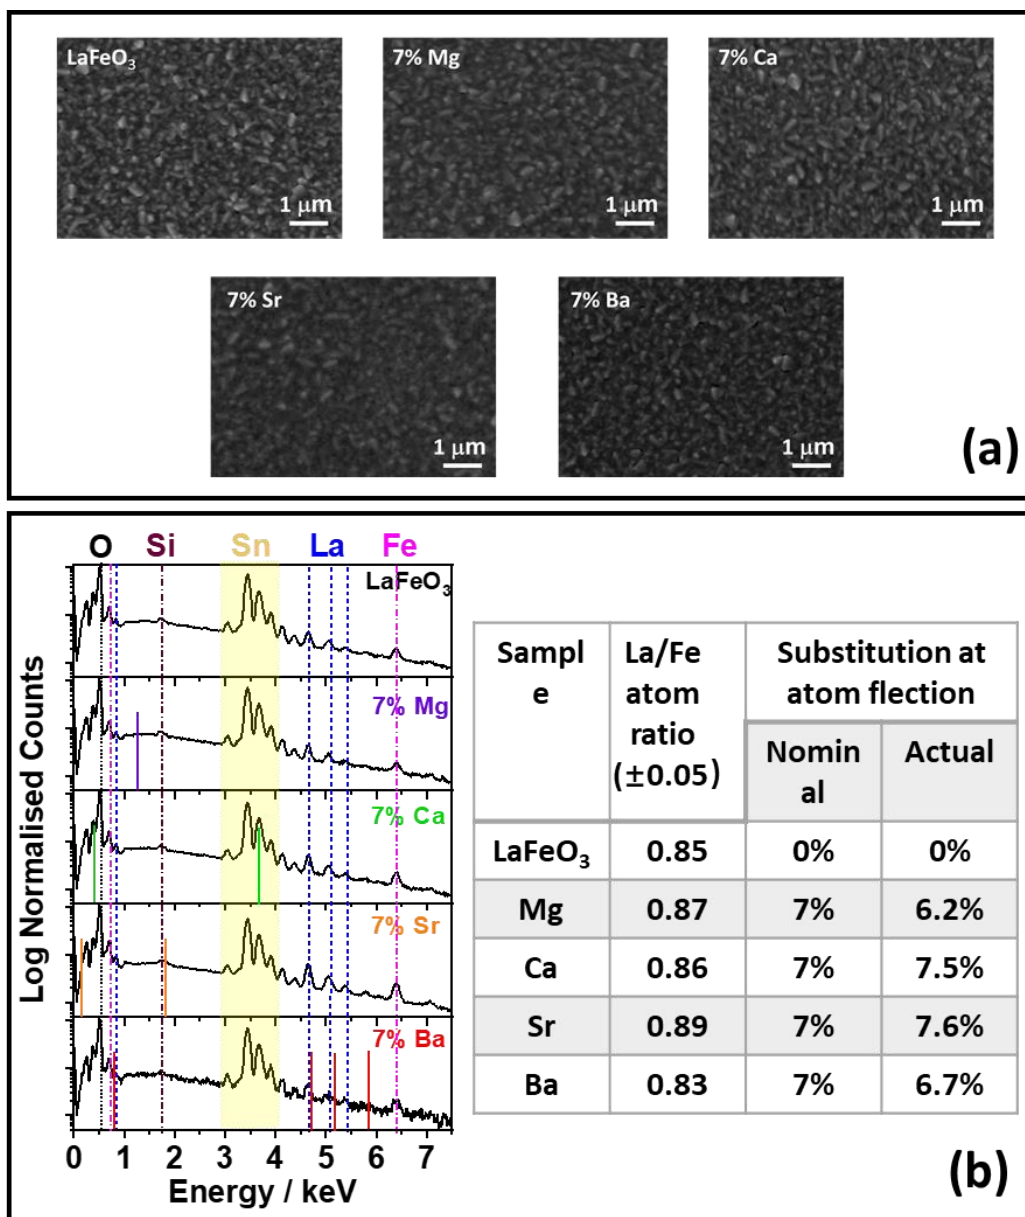

**Figure S1. Topography and composition of alkaline-earth metal cation (AMC) substituted LaFeO<sub>3</sub> (LFO):** Top view scanning electron micrographs (a) and energy dispersive analysis of X-rays spectra (b) of pristine and 7% AMC substituted LFO thin-films.

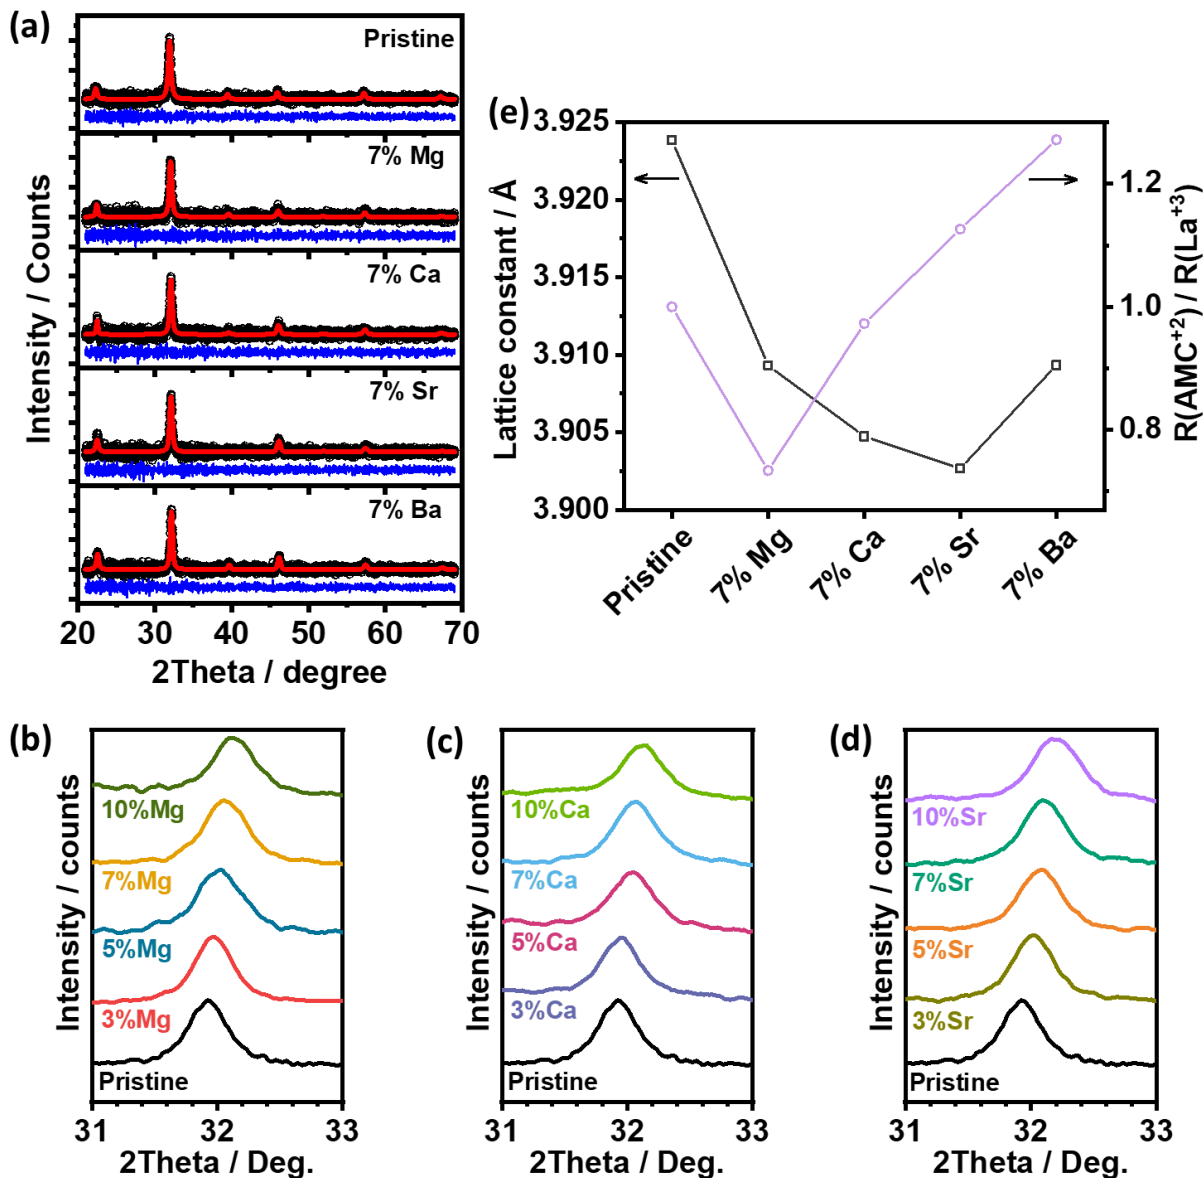

**Figure S2. XRD analysis of AMC substituted LaFeO<sub>3</sub> (LFO):** (a) XRD patterns of the pristine and 7% AMC substituted LFO refined to the *pm-3m* cubic phase JCPDS-ICDD database file 01-075-0541; evolution of the (110) peak as a function of extent of LFO substitution by (b) Sr<sup>2+</sup>, (c) Ca<sup>2+</sup> and (d) Mg<sup>2+</sup>. (e) Lattice constant extracted from full-profile structural Pawley refinement shown in (a). Despite the flat difference curve, the refinement could not converge below  $R_p$  and  $R_{wp}$  of 18% and 23%, respectively. The uncertainty in the refinement arises from the scatter in the experimental XRD and nanoscale crystalline domain of the thin-films. Although the trend is clear and unambiguous, the absolute values of the estimated lattice parameters must be considered cautiously.

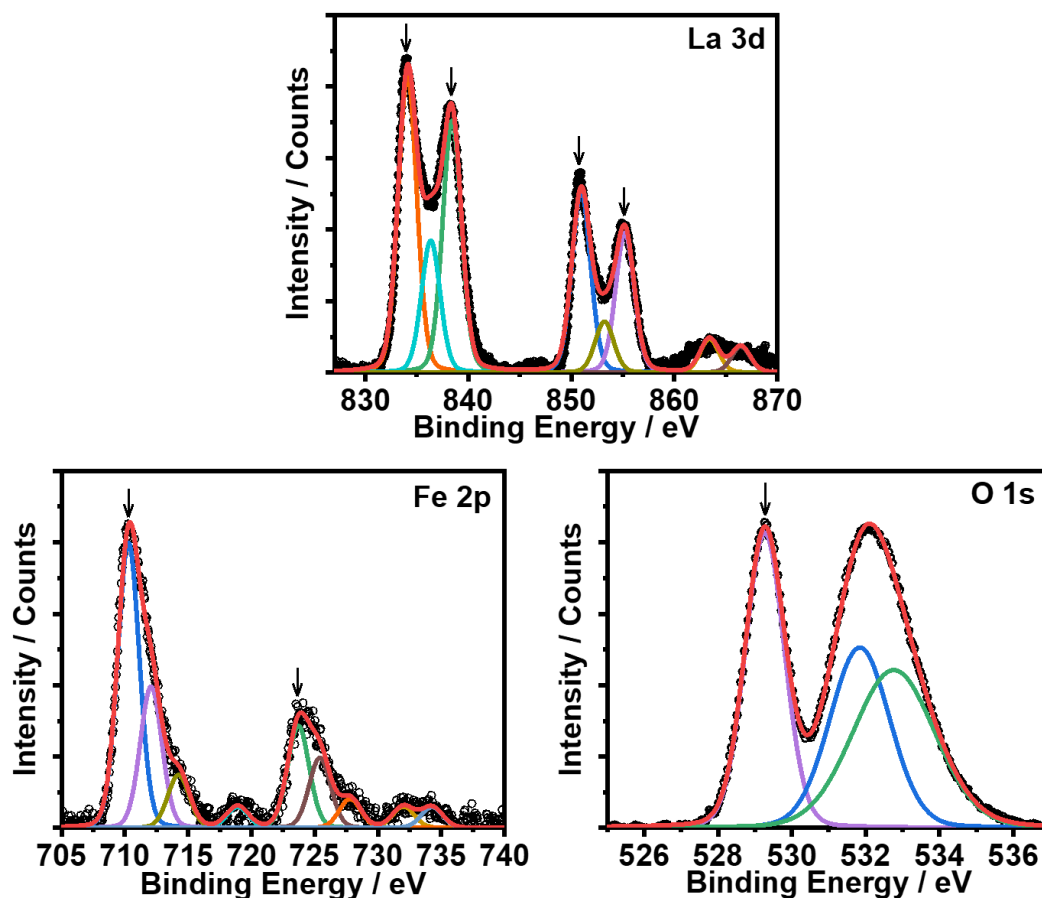

**Figure S3. Deconvolution of La 3d, Fe 2p, O 1s XPS bands of 7% Sr substituted LFO thin-film.** The La 3d shows two photoemission peaks at 833.9 (La 3d<sub>5/2</sub>) and 850.9 eV (La 3d<sub>3/2</sub>) with a 17eV spin-orbit component between the doublet, confirming the La<sup>3+</sup> oxidation state. The Fe 2p spectrum shows the Fe 2p<sub>3/2</sub> around 710 eV and Fe 2p<sub>1/2</sub> at 724.0 eV, with a satellite peak at 724.2 eV. The Fe 2p peak is deconvoluted into three components, with the most prominent associated with Fe<sup>3+</sup> species and the other two peaks at higher binding energies (BE) correspond to higher iron oxidation states. The O 1s peak shows a sharp band around 529 eV linked to the oxygen in the perovskite lattice, while the other two contributions are assigned to a hydroxyl group and carbonated species. The discussion in the main text focused on the evolution of the Fe 2p<sub>3/2</sub> and O 1s bands as a function of AMC substitution. However, we also noticed that the higher BE components of the O 1s appear to be affected by AMC substitution (see **Figure 2b** and **2d** of the main text). We rationalise this observation as variations in the relative intensity of the hydroxyl and carbonated photo-emission responses, as opposed to shifts in the binding energy.

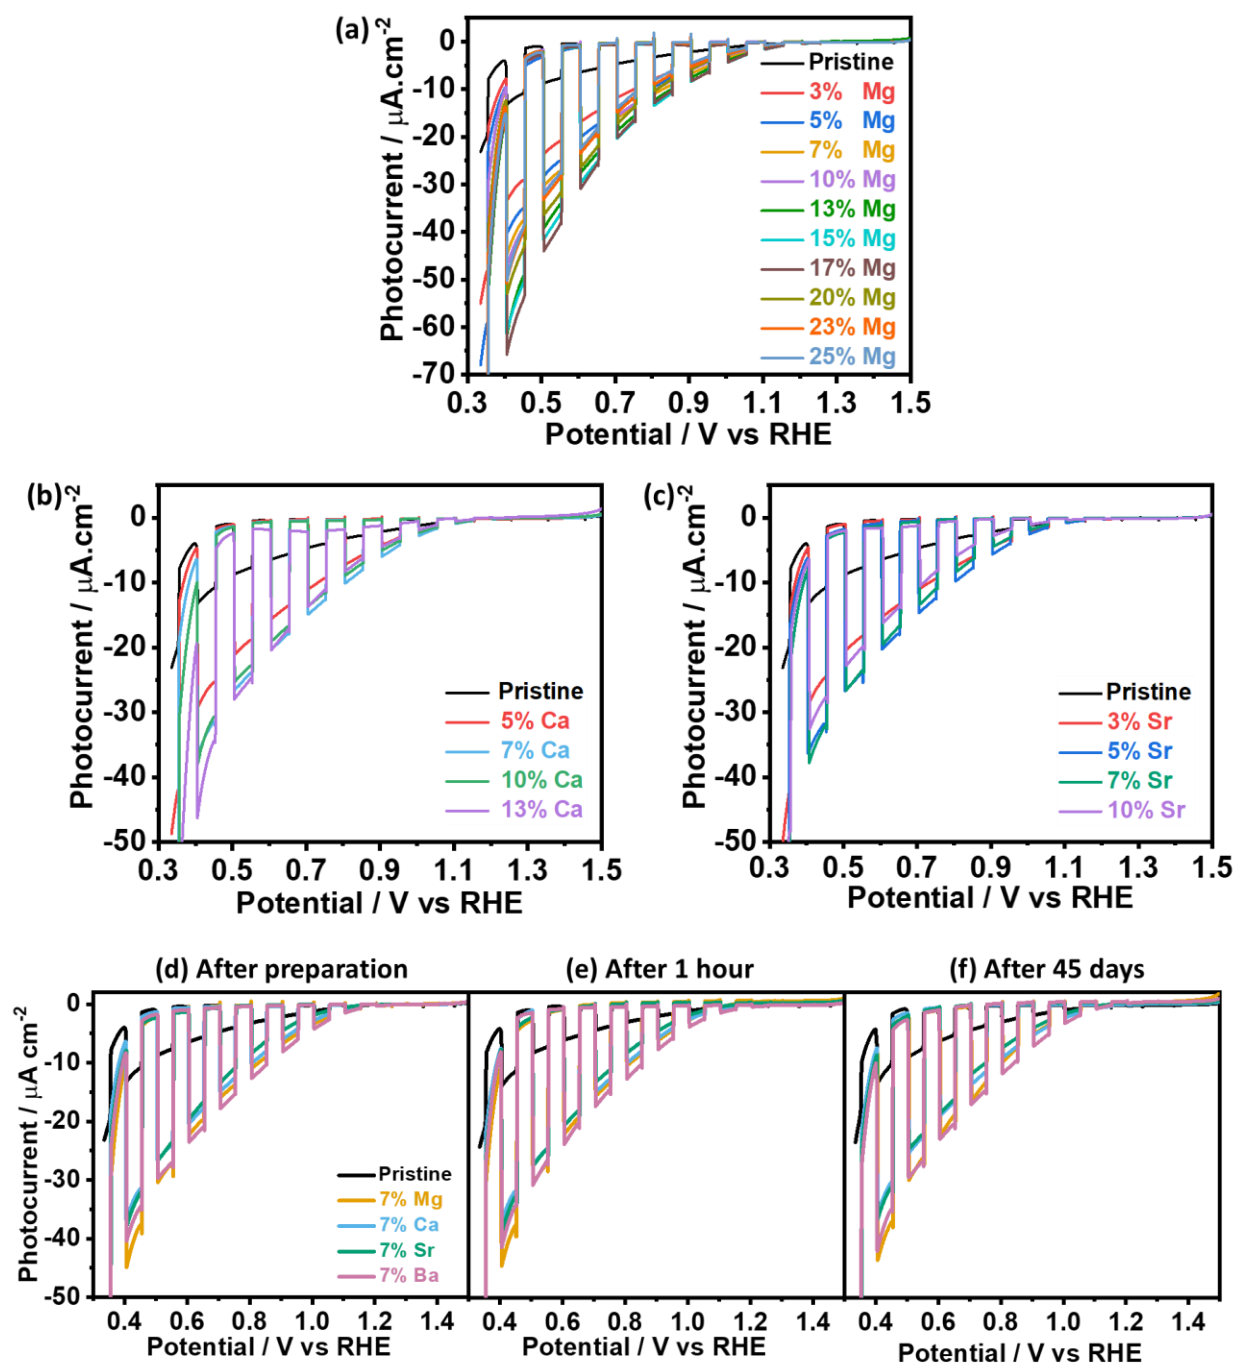

**Figure S4. Photoelectrochemical responses of AMC substituted LFO in the presence of  $O_2$ :** Linear sweep voltammograms (LSV) of (a)  $Mg^{2+}$ , (b)  $Sr^{2+}$  and (c)  $Ca^{2+}$  substituted  $LaFeO_3$  thin-films recorded at 5 mV/s under a square wave 405 nm illumination and photon flux of  $3.25 \times 10^{15} cm^{-2} s^{-1}$ . LSV curves of the pristine and 7% AMC substituted films recorded under identical conditions: (d) after preparation, (e) after 1 hr of continuous illumination and (f) after 45 days exposed to air. All experiments are recorded under  $O_2$ -saturated aqueous solution containing 0.1 M  $Na_2SO_4$  at pH 12.

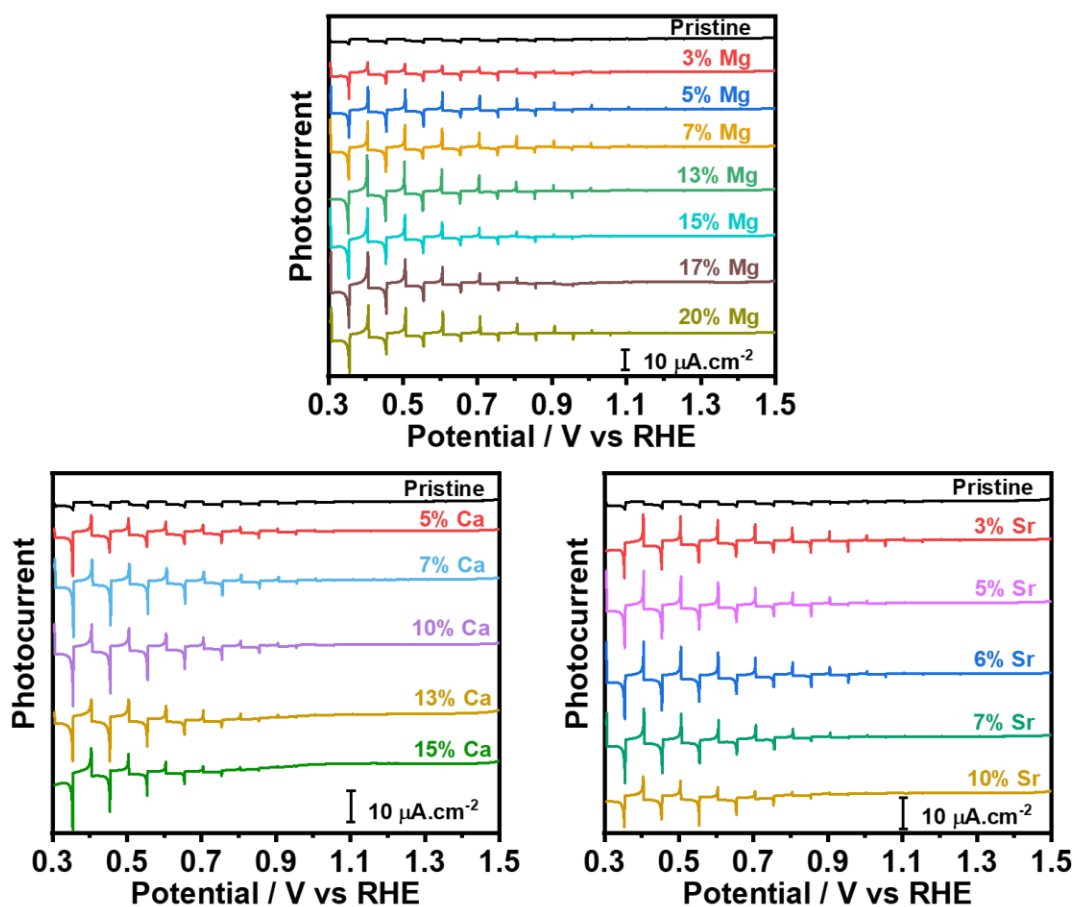

**Figure S5. Photoelectrochemical responses of AMC substituted LFO under  $\text{O}_2$  free conditions.** LSVs (5 mV/s) of LFO films with different substitution levels of  $\text{Mg}^{2+}$ ,  $\text{Ca}^{2+}$  and  $\text{Sr}^{2+}$  performed under 405 nm square wave light perturbation (photon flux of  $3.25 \times 10^{15} \text{ cm}^{-2} \text{ s}^{-1}$ ) in Ar-saturated 0.1M  $\text{Na}_2\text{SO}_4$  aqueous solution pH 12.

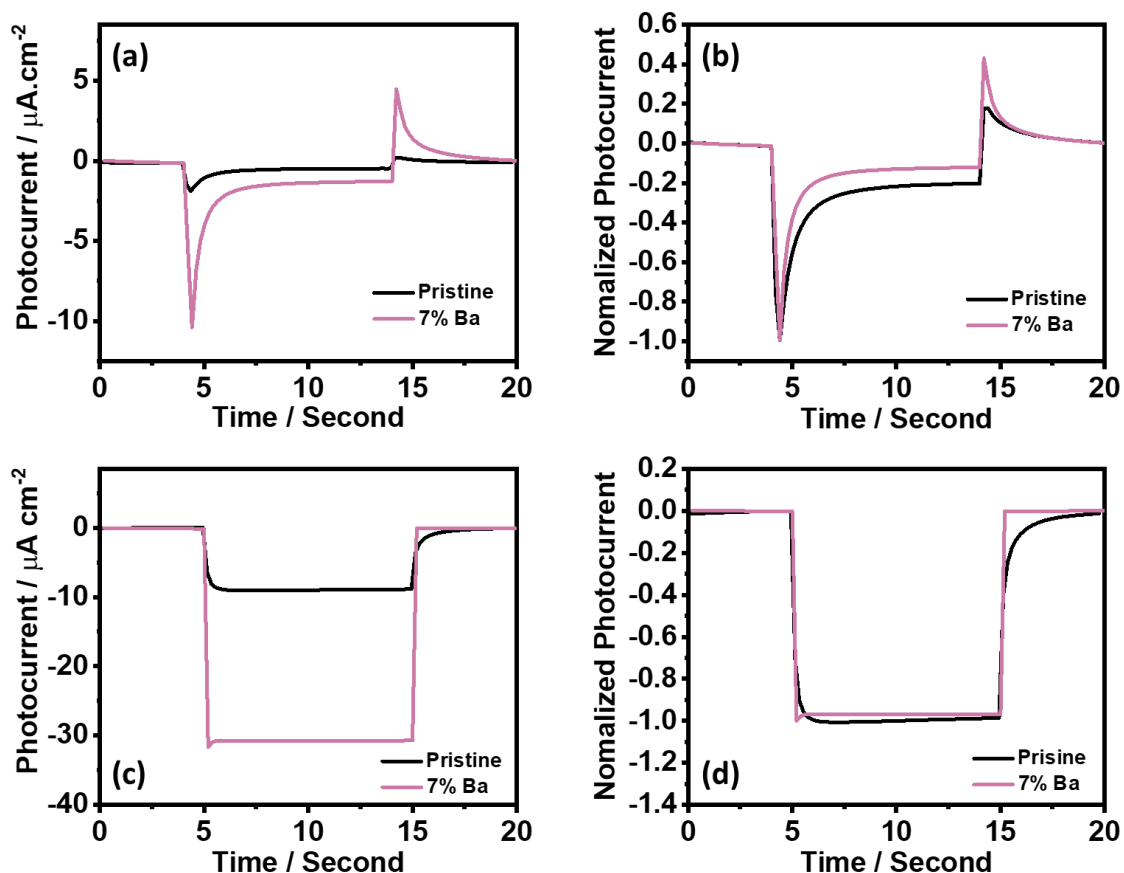

**Figure S6. Dynamic photocurrent transient responses of pristine and 7% Ba substituted LFO.** Transient photocurrent responses of pristine and 7%  $\text{Ba}^{2+}$  substituted LFO thin-films at 0.45 V vs RHE in Ar-saturated (a) and  $\text{O}_2$ -saturated (c) 0.1M  $\text{Na}_2\text{SO}_4$  aqueous solution (pH 12). The films are illuminated with a 405 nm LED ( $3.25 \times 10^{15} \text{ cm}^{-2} \text{ s}^{-1}$  photon flux). (b) displays photocurrent transients normalised by the maximum photocurrent under Ar-saturated solution, showing a comparatively smaller photostationary current at 7%  $\text{Ba}^{2+}$  substituted films. (d) shows normalised photocurrent responses in  $\text{O}_2$  saturated solutions. The figure shows that AMC substitution not only increases the overall photocurrent (c) but also decreases the response time during the on and off-transients. This is linked to the dampening of the A-states responsible for majority carrier trapping upon AMC substitution.

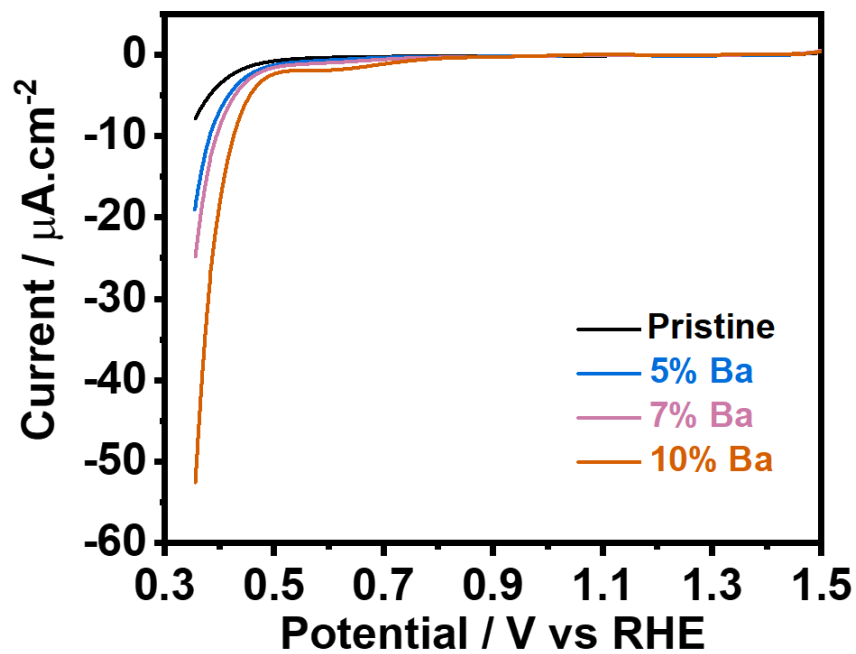

**Figure S7. Oxygen reduction reaction in the dark as a function of  $\text{Ba}^{2+}$  content.** Electrochemical responses Linear-sweep voltammograms recorded at 5 mV/s for pristine and Ba substituted  $\text{LaFeO}_3$  in  $\text{O}_2$ -saturated  $\text{Na}_2\text{SO}_4$  aqueous solutions (pH 12) in the dark.
